# Supplementary material for: HBV genome-enriched single cell sequencing revealed heterogeneity in HBV-driven hepatocellular carcinoma (HCC)
Source: BMC Med Genomics. 2022 Jun 16;15:134. doi: 10.1186/s12920-022-01264-2 (PMC9205089; doi:10.1186/s12920-022-01264-2)
Supplement: Supplementary file 9 — Additional file 9: Table S8. HBV integrations detected with WGS from MHCC97H. At least one soft clipped read and two adjacent reads are required to call HBV integration. [file 12920_2022_1264_MOESM9_ESM.xlsx]

## Sheet: Sheet1
Chrom	Pos	#soft clipped	#adjacent
chr1	156957504	3	3
chr3	65603543	2	0
chr4	61674	2	1
chr7	93119460-93119609	0	2
chr16	56966332	1	3
