# Supplementary material for: HBV genome-enriched single cell sequencing revealed heterogeneity in HBV-driven hepatocellular carcinoma (HCC)
Source: BMC Med Genomics. 2022 Jun 16;15:134. doi: 10.1186/s12920-022-01264-2 (PMC9205089; doi:10.1186/s12920-022-01264-2)
Supplement: Supplementary file 15 — Additional file 15: Table S14. Genome regions where CNV amplification is significantly associated with decreasing rate of rare HBV integration carrying cells, when focusing on chr8:118268310–146364022, whose CNV differentiated clone 2 vs. clones 3, 4. [file 12920_2022_1264_MOESM15_ESM.xlsx]

## Sheet: all_sig_region_05_8q_clone234
chr8	122815765	123386212
chr8	125078068	125641149
chr8	126204444	127342869
chr8	127911280	129048050
chr8	130765097	131328031
chr8	132461655	133034235
chr8	134725019	135296227
chr8	138135781	138701874
chr8	139271954	139837809
chr8	141530514	142093619
chr8	143291757	143854617
